# Supplementary material for: Nfix Regulates Temporal Progression of Muscle Regeneration through Modulation of Myostatin Expression
Source: PubMed Central journal article supplement — Cell Rep. 2016 Feb 25;14(9):2238–49. doi: 10.1016/j.celrep.2016.02.014 (PMC4793149; doi:10.1016/j.celrep.2016.02.014), 2016-02-25
Supplement: mmc1.pdf [file mmc1.pdf]

**Cell Reports, Volume 14**

## **Supplemental Information**

### **Nfix Regulates Temporal Progression of Muscle Regeneration through Modulation of Myostatin Expression**

**Giuliana Rossi, Stefania Antonini, Chiara Bonfanti, Stefania Monteverde, Chiara Vezzali, Shahragim Tajbakhsh, Giulio Cossu, and Graziella Messina**

## Supplemental Information

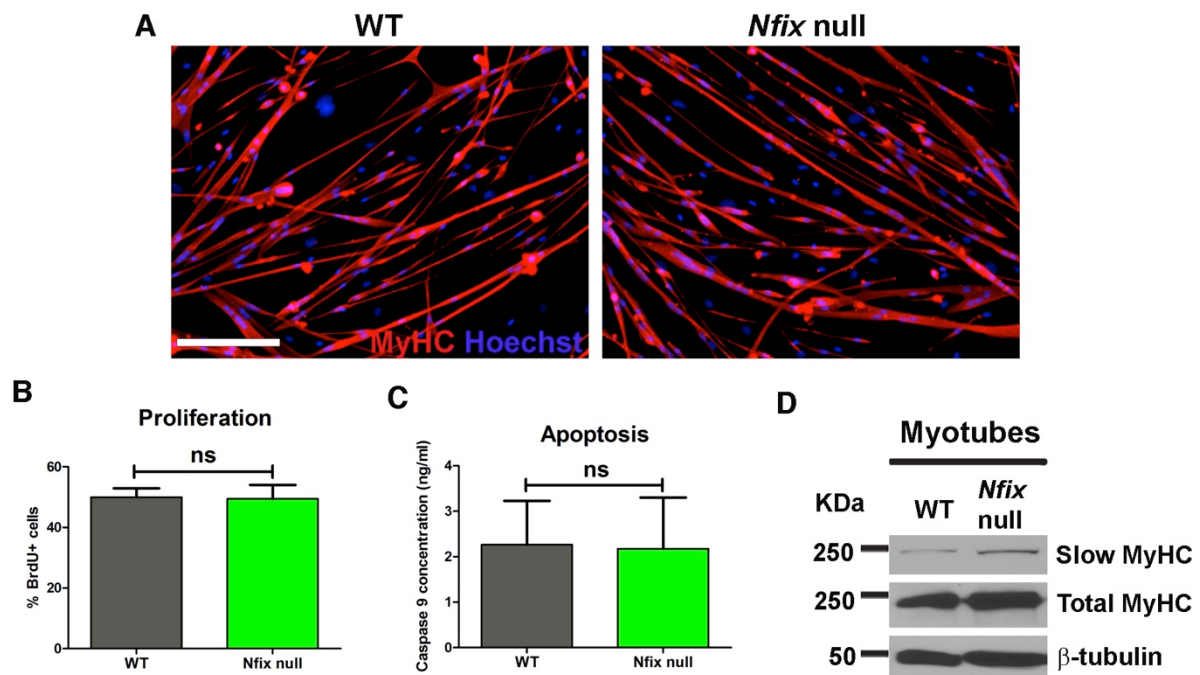

**Fig.S1. Isolated satellite cells in culture correctly differentiate in absence of *Nfix*, while expressing higher levels of slow MyHC, Related to Fig.1.**

**(A)** Immunofluorescence analysis of total MyHC expression (red) on wild-type and *Nfix* null satellite cell-derived myotubes after 48 h in differentiation medium. Hoechst was used to stain nuclei. n=3 independent myoblast preparations. Scale bar represents 50 $\mu$ m.

**(B)** Quantification of the percentage of wild-type and *Nfix* null BrdU incorporating myoblasts after 1h of exposure to 50 $\mu$ M BrdU. The experiment was performed in duplicate (n=2 independent myoblast preparations) in proliferation conditions. Data are presented as mean  $\pm$  SD. ns: not significant, two-tailed unpaired *t* Test.

**(C)** ELISA assay measuring caspase 9 concentration as a marker of apoptosis. The test was performed on protein extracts from wild-type and *Nfix* null proliferating myoblasts. Data are presented as mean  $\pm$  SD. ns: not significant, two-tailed unpaired *t* Test. n=2 assays performed on independent myoblast preparations.

**(D)** Western blot analysis of slow and total MyHC expression on wild-type and *Nfix* null satellite cell-derived myotubes after 48 h in differentiation medium.  $\beta$ -tubulin was used to normalize the amount of loaded proteins.

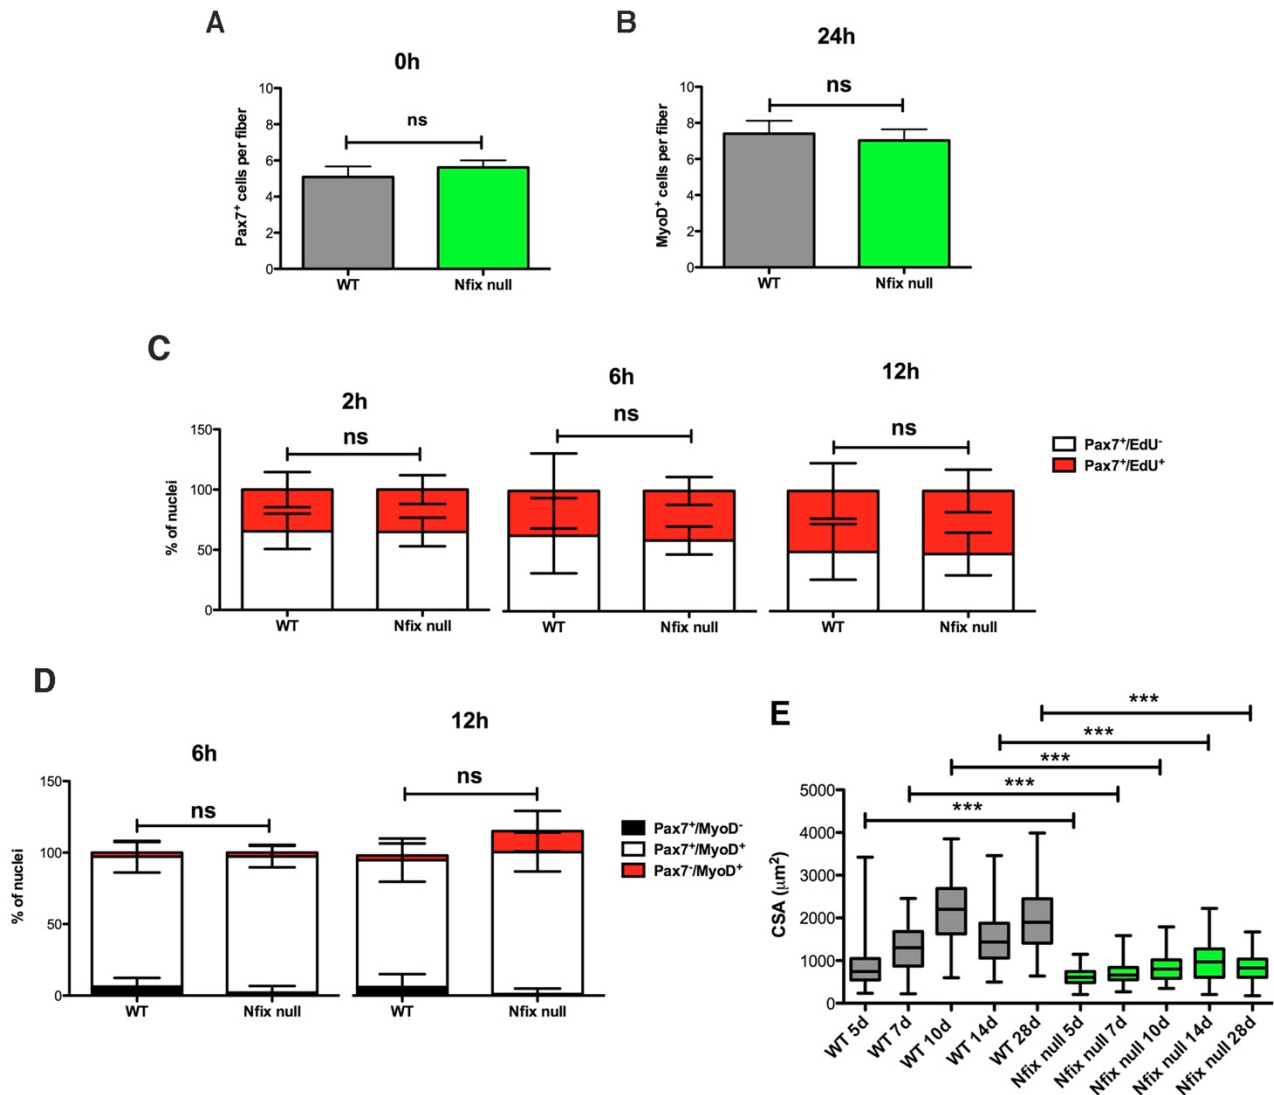

**Fig.S2. Number and proliferation of satellite cells associated to myofibers does not change in the absence of Nfix, Related to Figs.2 and 3.**

(A) Quantification of Pax7<sup>+</sup> satellite cells associated to freshly isolated wild-type and *Nfix* null myofibers. (n=35 WT and 41 *Nfix* null myofibers). Data are presented as mean ± SD. ns: not significant, two-tailed unpaired *t* Test.

(B) Quantification of MyoD<sup>+</sup> satellite cells associated to wild-type and *Nfix* null myofibers after 24 hours in culture. (n=32 WT and 34 *Nfix* null myofibers). Data are presented as mean ± SD. ns: not significant, two-tailed unpaired *t* Test.

(C) Quantification of the percentage of proliferating (EdU<sup>+</sup>) wild-type and *Nfix* null satellite cells after 2 (n=18 WT and 14 *Nfix* null myofibers), 6 (n=7 WT and 15 *Nfix* null myofibers), and 12 hours (n=8 WT and 16 *Nfix* null myofibers) (h) in culture. Data are presented as mean ± SD. ns: not significant, two-tailed unpaired *t* Test.

(D) Quantification of the percentage of satellite cells expressing MyoD and Pax7 after 6 (n=9 WT and 22 *Nfix* null myofibers) and 12 hours (n=10 WT and 24 *Nfix* null myofibers) in culture. Data are presented as mean ± SD. ns: not significant, two-tailed unpaired *t* Test.

(E) Measurement of the myofiber cross sectional area distribution in WT and *Nfix* null regenerating muscles at different time points from injury. n=225 myofibers. Data are presented as mean±whiskers from min to max. \*\*\*P < 0.001; two-tailed unpaired *t* Test.

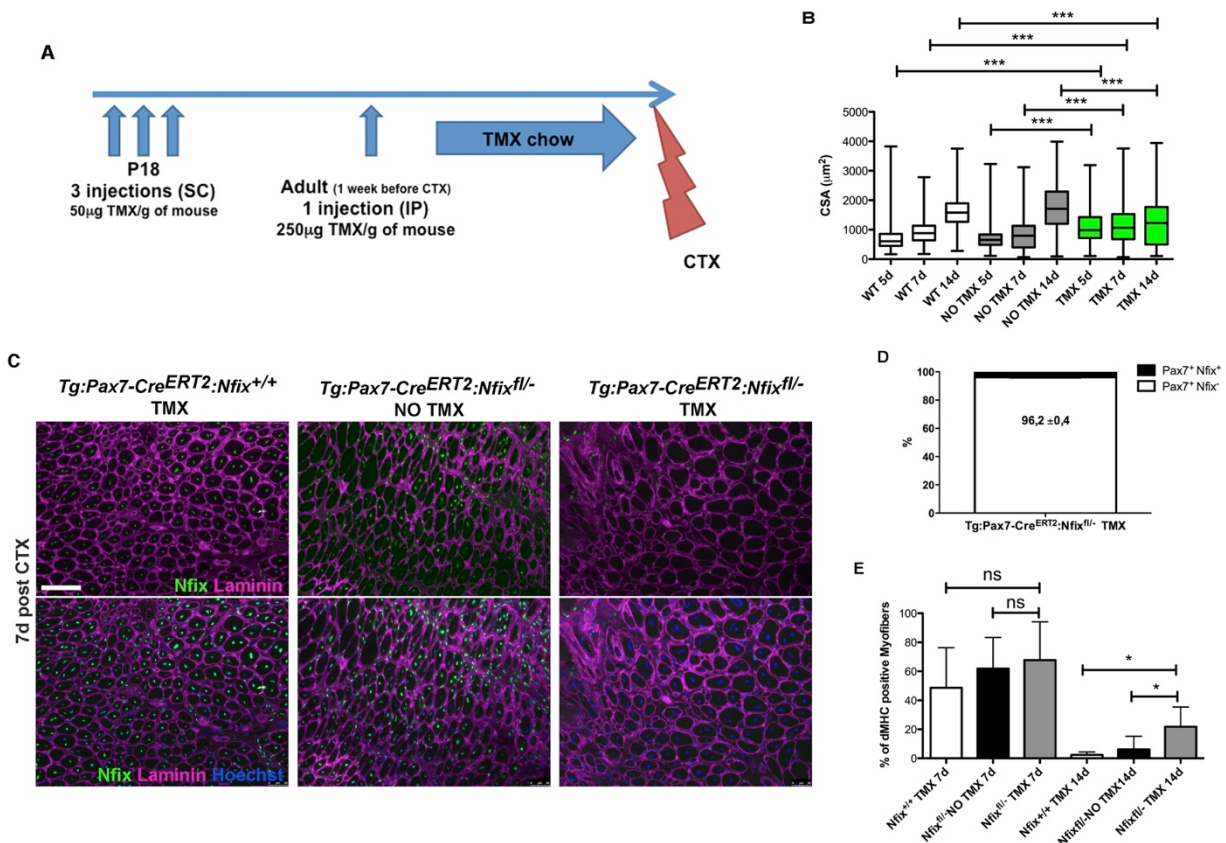

**Fig.S3. Tamoxifen treatment of *Tg:Pax7-Cre<sup>ERT2</sup>;Nfix<sup>fl/-</sup>* mice determines Nfix excision in satellite cells, Related to Fig.4.**

(A) Scheme representing the protocol used for tamoxifen treatment (TMX) and cardiotoxin (CTX) injection. SC, subcutaneous. IP, intraperitoneal.

(B) Measurement of the myofiber cross sectional area distribution in regenerating muscles of *Tg:Pax7-Cre<sup>ERT2</sup>;Nfix<sup>+/+</sup>* (indicated as WT) and *Tg:Pax7-Cre<sup>ERT2</sup>;Nfix<sup>fl/-</sup>* mice with (TMX) or without (NO TMX) tamoxifen at different time points from injury. n=750 myofibers. Data are presented as mean±whiskers from min to max. \*\*\*P < 0.001; two-tailed unpaired *t* Test.

(C) Immunofluorescence analysis of Nfix expression (green) in *Tg:Pax7-Cre<sup>ERT2</sup>;Nfix<sup>+/+</sup>* and *Tg:Pax7-Cre<sup>ERT2</sup>;Nfix<sup>fl/-</sup>* mice with (TMX) or without (NO TMX) tamoxifen treatment 7 days (d) after cardiotoxin injection. Laminin, purple; Hoechst, nuclei. n=3 mice for each group. Scale bar represents 100µm.

(D) Graphical representation of the percentage of Nfix excision in tamoxifen treated *Tg:Pax7-Cre<sup>ERT2</sup>;Nfix<sup>fl/-</sup>* mice. Quantification was obtained counting the percentage of cells expressing Pax7 and Nfix in muscle sections. n=2 mice. Data are presented as mean ± SD.

(E) Quantification of the percentage of dMHC positive myofibers in *Tg:Pax7-Cre<sup>ERT2</sup>;Nfix<sup>+/+</sup>* and *Tg:Pax7-Cre<sup>ERT2</sup>;Nfix<sup>fl/-</sup>* mice with (TMX) or without (NO TMX) tamoxifen treatment 7 and 14 days following cardiotoxin injection. For time point 7, n=5 *Tg:Pax7-Cre<sup>ERT2</sup>;Nfix<sup>+/+</sup>*, n=8 *Tg:Pax7-Cre<sup>ERT2</sup>;Nfix<sup>fl/-</sup>* NO TMX mice, n=6 *Tg:Pax7-Cre<sup>ERT2</sup>;Nfix<sup>fl/-</sup>* TMX mice. For time point 14, n=5 *Tg:Pax7-Cre<sup>ERT2</sup>;Nfix<sup>+/+</sup>*, n=6 *Tg:Pax7-Cre<sup>ERT2</sup>;Nfix<sup>fl/-</sup>* NO TMX mice, n=6 *Tg:Pax7-Cre<sup>ERT2</sup>;Nfix<sup>fl/-</sup>* TMX mice. Data are presented as mean ± SD. ns: not significant, \*P < 0,05, two-tailed unpaired *t* Test.

A

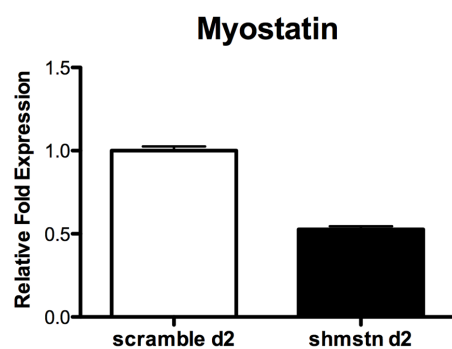

B

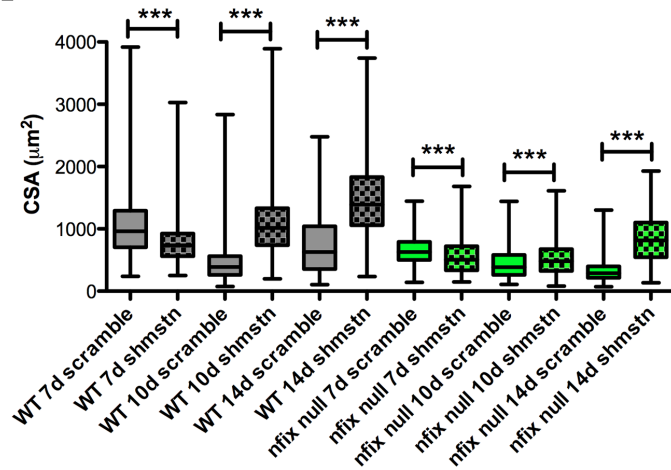

C

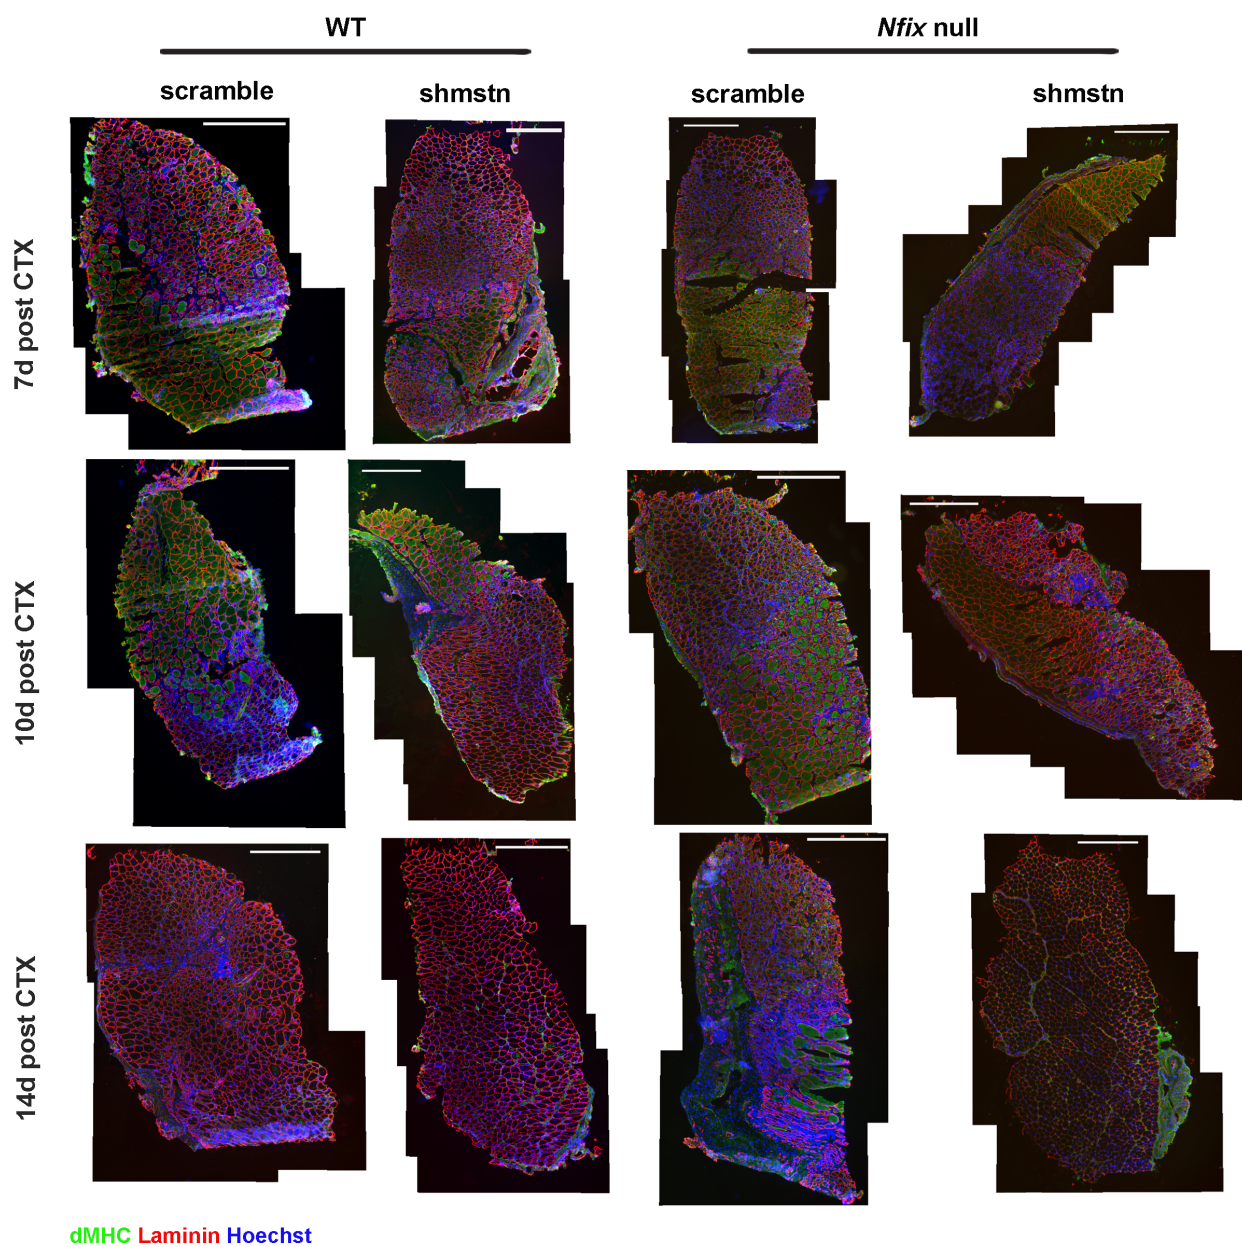

**Fig.S4. *In vivo* silencing of Myostatin rescues the regeneration defects of *Nfix* null muscles, Related to Fig.6.**

**(A)** Real-Time qPCR showing Myostatin expression in *Tibialis anterior* muscles at 2 days (d) after electroporation with control (scramble) or shMyostatin (shmstn) plasmids. Data are presented as mean  $\pm$  SD.

**(B)** Measurement of the myofiber cross sectional area distribution in WT and *Nfix* null regenerating muscles electroporated with scramble or shmstn plasmids. n=475 myofibers. Data are presented as mean $\pm$ whiskers from min to max. \*\*\*P < 0.001; two-tailed unpaired *t* Test.

**(C)** Immunofluorescence analysis of developmental MyHC expression (dMHC, green) on regenerating wild-type and *Nfix* null *Tibialis Anterior* muscle sections after muscle electroporation with a control plasmid (scramble) or with a plasmid carrying an shRNA targeting myostatin (shmstn). Muscle sections were collected and stained 7, 10 and 14 days (d) after cardiotoxin (CTX) injection. Muscles were electroporated 4 days (d) after cardiotoxin injection. Laminin, red; Hoechst, nuclei. Images represent photomerge reconstruction of the entire muscle section shown in Fig.6. Scale bar represents 500 $\mu$ m.

**Table S1. Related to Experimental Procedures. List of primers used for mouse genotyping**

| Primer Name                        | Sequence                       |
|------------------------------------|--------------------------------|
| Nfix I1F5                          | ATGGACATGTCATGGGTGCGACAG       |
| Nfix I2R2-CEC                      | AAGCCCCTCAGCTCTAGCACAGAG       |
| Nfix I1R1                          | AACCAGAGGCACGAGAGCTTGTC        |
| <i>Pax7-Cre<sup>ERT2</sup></i> for | CCACACCTCCCCCTGAACCTGAAACATAAA |
| <i>Pax7-Cre<sup>ERT2</sup></i> rev | GAATTCCCCGGGGAGTCGCATCCGCGG    |

**Table S2. Related to Experimental Procedures. List of primers used for qRT-PCR**

| Primer Name   | Sequence                |
|---------------|-------------------------|
| Myostatin for | AAGATGACGATTATGACGCTACC |
| Myostatin rev | CCGCTTGCATTAGAAAGTCAGA  |
| GAPDH for     | AGGTCGGTGTGAACGGATTTG   |
| GAPDH rev     | TGTAGACCATGTAGTTGAGGTCA |

**Table S3. Related to Experimental Procedures. List of primers used for ChiP**

| Primer Name                     | Sequence                |
|---------------------------------|-------------------------|
| Myostatin promoter (415-539)for | TTGTGGAGCAGGAGCCAATC    |
| Myostatin promoter (415-539)rev | GTACCGTCCGAGAGACAACC    |
| Myostatin promoter (116-369)for | GTAACAAAACAGCACTCCAAGTC |
| Myostatin promoter (116-369)rev | CCCTGTCTGTCACAAGTCACC   |
| Nfatc4 promoter for             | GGCGCTTAACCCTTTAGGTG    |
| Nfatc4 promoter rev             | CAAGACAGGGGAGCAGTCAC    |
| Intergenic region for           | GACCTGCCTGTTCCCTTCTTG   |
| Intergenic region rev           | GTTACCCAGCACTGCAAAGG    |
